# Supplementary material for: Wave 2 strains of atypical Vibrio cholerae El Tor caused the 2009–2011 cholera outbreak in Papua New Guinea
Source: PubMed Central journal article supplement (PMC6487313; doi:10.1099/mgen.0.000256), 2019-02-27
Supplement: mgen-5-256-s001.pdf [file mgen-5-256-s001.pdf]

# 1 **Supplementary Materials**

## 3 **Detection of Genetic Insertions**

4 **CTX prophage location:** The primers for chromosome I were designed to amplify the region  
5 between locus tags VC1451 and VC1479 (strain N16961, NC\_002505 (Chr 1)), while the  
6 primers for chromosome II amplified the region between locus tags VCA0569 and VCA0570  
7 (strain N16961, NC\_002506 (Chr 2)). Long-range PCR amplification of the CTX region was  
8 carried out using the Roche Expand Long Template PCR System™ using primers to  
9 determine the presence of CTX prophage on chromosome I (C1ctxF -  
10 AGTGCGATTGACGCTCTGGTTCAAGCGATGAGTGG and C1ctxR -  
11 TGATTGGCCAGAGAGGTACATAAGAGTTCAAGTGG); and chromosome II (C2ctxF -  
12 CTACCCACATTA ACTCACGCTGAACAGCAAGTCGC and C2ctxR -  
13 GAATCGAAAGGACACAAAGTCAAATTAGCAGGTGG). Standard agarose gel  
14 electrophoresis and DNA staining methods were used to determine the size of amplicons and  
15 for the estimation of DNA quantity. Sequencing was performed on an Applied Biosystems  
16 instrument using a standard Sanger sequencing protocol (Macrogen, Seoul, Korea).

17 **SXT ICE:** In the *V. cholerae* wave 2 and 3 strains, the SXT ICE element is inserted into the  
18 *prfC* gene (strain N16961, NC\_002505 (Chr 1)). Primers designed to flank the insertion point  
19 will amplify a product of 1.1 kb if the SXT ICE is absent. Blast was used to confirm the  
20 absence of SXT ICE using previously sequenced *V. cholerae* SXT ICE elements as query  
21 (e.g. GQ463140- GQ463143). Primers are listed in Table S1.

22 The SXT ICE was absent in all isolates, as determined by PCR amplification of the region of  
23 the genome spanning the insertion point of the SXT ICE (producing a 1.1 kb product for all  
24 isolates).

## 26 **Sequence Analysis**

27 Sequencing libraries were prepared using the Illumina TruSeq library preparation kit and run  
28 on the HiSeq 2000 Illumina sequencing instrument.

29 Raw reads were assembled using *de novo* assembler Velvet v0.7.03 as described in Mutreja et  
30 al. 2011 (reference 14 in main text). The Wellcome Trust Sanger Institute hosted genome  
31 viewing and comparing tools Artemis and Artemis Comparison Tool (ACT) were used  
32 further analyse the genomic content. A summary of read data and the *de novo* assembly is  
33 provided in Table S5.

34 The presence/absence of GI-15 and SXT was confirmed using ACT and manually comparing  
35 the assembled genomes against the reference strains. For the detection of GI-15, methods  
36 described by Chun et al (1) were used (refer to insertion points for GI-15 provided in Table  
37 S1 of Chun et al (1), relative to *V. cholerae* N16961). For detection of SXT, *V. cholerae*  
38 O139 strain MO10 (accession number AY055428) was used, as conducted by Mutreja *et al*,  
39 2011 (reference 14 in main text).

40 The Velvet assembly graph for the Lae read set revealed a circularised contig of  
41 approximately 34 kb. The trimmed circularised plasmid sequence was 33,886 bp in length.

42

43

## 44 **Phenotypic Testing**

45 **Biotyping:** Phenotypic characteristics associated with *V. cholerae*, namely the Voges-  
46 Proskauer reaction, susceptibility to polymyxin B (50U) and chicken erythrocyte  
47 agglutination, were determined using established procedures (2).

48 Each of 21 isolates of *V. cholerae* was characterized to determine biotype and all had  
49 characteristics of O1 El Tor strains, i.e. positive for the Voges-Proskauer reaction, resistant to  
50 polymyxin B and positive agglutination of chicken erythrocytes (Table S2).

51 **Antimicrobial susceptibility testing:** Susceptibility to selected antibiotics was conducted  
52 using the Kirby-Bauer disc diffusion method following published standards for ampicillin,  
53 chloramphenicol, tetracycline and trimethoprim-sulfamethoxazole (3, 4). Where interpretive  
54 zones were not available for *V. cholerae* (gentamicin, ciprofloxacin, streptomycin and  
55 cefotaxime), we referred to the Clinical and Laboratory Standards Institute interpretive zones  
56 for Enterobacteriaceae (3). The control strain used was *Escherichia coli* ATCC25922. This is  
57 consistent with methods of Sjölund-Karlsson et al (5) in analyzing antimicrobial  
58 susceptibility of *V. cholerae*, and is also the origins of interpretive zones provided for  
59 ciprofloxacin in the relevant WHO manual (4).

60 The antibiotic resistance profile of the isolates varied, although the overall trend was that  
61 PNG isolates were mostly susceptible to the antibiotics tested (Table S1). Among the  
62 fourteen isolates tested, six had reduced susceptibility (intermediate resistance) to ampicillin.  
63 One isolate, L6, exhibited multidrug resistance (chloramphenicol and tetracycline). All  
64 isolates were susceptible to trimethoprim-sulfamethoxazole, streptomycin and ciprofloxacin.

65

66 Table S1: Origins, year of isolation, phenotypic characteristics and antimicrobial  
 67 susceptibility results of 21 isolates of *V. cholerae* from the PNG cholera outbreak.

| Isolate                                    | Year | CCA | VP             | Poly B | Amp | Ctx | Cip | Tet | TrS | Gn | St | Chl |
|--------------------------------------------|------|-----|----------------|--------|-----|-----|-----|-----|-----|----|----|-----|
| Morobe Province                            |      |     |                |        |     |     |     |     |     |    |    |     |
| L1                                         | 2010 | +   | +              | R      | S   | S   | S   | S   | S   | S  | S  | S   |
| L2                                         | 2010 | +   | +              | R      | I   | S   | S   | S   | S   | S  | S  | S   |
| L3 <sup>c</sup>                            | 2010 | +   | +              | R      | -   | -   | -   | -   | -   | -  | -  | -   |
| L4 <sup>c</sup>                            | 2010 | +   | +              | R      | I   | S   | S   | S   | S   | S  | S  | S   |
| L5 <sup>c</sup>                            | 2010 | +   | +              | R      | -   | -   | -   | -   | -   | -  | -  | -   |
| L6 <sup>c</sup>                            | 2010 | +   | + <sup>a</sup> | R      | S   | S   | S   | R   | S   | S  | S  | R   |
| Madang Province                            |      |     |                |        |     |     |     |     |     |    |    |     |
| M1                                         | 2010 | +   | +              | R      | S   | S   | S   | S   | S   | S  | S  | S   |
| M2                                         | 2010 | +   | +              | R      | I   | S   | S   | S   | S   | S  | S  | S   |
| M3 <sup>c</sup>                            | 2010 | +   | +              | R      | -   | -   | -   | -   | -   | -  | -  | -   |
| M4 <sup>c</sup>                            | 2010 | +   | +              | R      | -   | -   | -   | -   | -   | -  | -  | -   |
| M5 <sup>c</sup>                            | 2010 | +   | +              | R      | -   | -   | -   | -   | -   | -  | -  | -   |
| M6 <sup>c</sup>                            | 2010 | +   | +              | R      | -   | -   | -   | -   | -   | -  | -  | -   |
| Eastern Highlands Province                 |      |     |                |        |     |     |     |     |     |    |    |     |
| G1                                         | 2010 | +   | +              | R      | S   | S   | S   | S   | S   | S  | S  | S   |
| G2                                         | 2010 | +   | +              | R      | I   | S   | S   | S   | S   | S  | S  | S   |
| East Sepik Province                        |      |     |                |        |     |     |     |     |     |    |    |     |
| W1                                         | 2010 | +   | +              | R      | I   | S   | S   | S   | S   | S  | S  | S   |
| W2                                         | 2010 | +   | +              | R      | I   | S   | S   | S   | S   | S  | S  | S   |
| Central Province/National Capital District |      |     |                |        |     |     |     |     |     |    |    |     |
| P1                                         | 2011 | +   | +              | R      | S   | S   | S   | S   | S   | S  | S  | S   |
| P3                                         | 2011 | +   | + <sup>a</sup> | R      | S   | S   | S   | S   | S   | S  | S  | S   |
| P4                                         | 2011 | +   | + <sup>a</sup> | R      | S   | S   | S   | S   | S   | S  | S  | S   |
| P5                                         | 2011 | +   | +              | R      | S   | S   | S   | S   | S   | S  | S  | S   |
| Env1 <sup>b,c</sup>                        | 2010 | +   | +              | R      | -   | -   | -   | -   | -   | -  | -  | -   |

68 <sup>a</sup> Weak positive; <sup>b</sup> Env environmental isolates, from Madang Province; <sup>c</sup> Isolates new to this  
 69 study. All other isolates (L1, L2, M1, M2, G1, G2, W1, W2, P1, P3, P4, P5) were described  
 70 and partially characterised in Horwood et al, 2011 [4, main article]  
 71 CCA Chicken erythrocyte agglutination; VP Vogues Proskauer; Poly B polymyxin B (50 U)  
 72 susceptibility; Amp ampicillin; Chl chloramphenicol; Cip ciprofloxacin; Tet tetracycline; TrS

73 trimethoprim-sulfamethoxazole; Gn Gentamicin; St streptomycin; Ctx cefotaxime; S  
74 sensitive; I intermediate resistance; R resistant; - not tested as isolates lost viability.

75

76

77 Table S2: Primer sequences and outcomes for detection of the SXT ICE and characterisation of the CTX prophage for PNG *V. cholerae* isolates. All 21  
 78 isolates yielded the same result for a given test, except for plasmid detection.

|                      | <b>Forward primer</b>                | <b>Reverse primer</b>               | <b>PNG strains</b> |
|----------------------|--------------------------------------|-------------------------------------|--------------------|
| <b>SXT insertion</b> | (this study)                         |                                     |                    |
| Ch1-sxt              | TCCACATCGATTGAAACGTCGACGCGAGCTCACTG  | AATTGCATAACAGAGGTGGTCACCGAAATACCACG | negative           |
| <b>Chromosome</b>    |                                      |                                     |                    |
| <b>CTX</b>           | (this study)                         |                                     |                    |
| Ch1-ctxtlc           | AGTGCGATTGACGCTCTGGTTCAAGCGATGAGTGG  | TGATTGGCCAGAGAGGTACATAAGAGTTCAAGTGG | negative           |
| Ch2-ctxctx           | CTACCCACATTAACCTCACGCTGAACAGCAAGTCGC | GAATCGAAAGGACACAAAGTCAAATTAGCAGGTGG | positive           |
| <b>Plasmid</b>       |                                      |                                     |                    |
| Plasmid parB         | GGTGGTTATGTCATTCAGAACTAGG            | CGTCGATGATAAGCTCATTACTCTC           | negative*          |
| Plasmid virB4        | AAACGAATTACAACAGTCTCTTTGC            | TCACATCTAAAATTACGCTTTCACC           | negative*          |

79 \* All isolates negative except L1

80

81

82 Table S3: Draft genome sequence overview of PNG isolates L1 and M2.

| Read Set |           |               |                    |                        |                                   |            | Draft assembly |                   |                                             |
|----------|-----------|---------------|--------------------|------------------------|-----------------------------------|------------|----------------|-------------------|---------------------------------------------|
| Isolate  | Reads     | Yield (bases) | Average<br>quality | Initial read<br>length | Average<br>trimmed<br>read length | × coverage | Total bases    | No. of<br>contigs | Number of<br>protein<br>coding<br>sequences |
| L1       | 9,316,148 | 913,824,831   | 35.7               | 101                    | 98                                | 866        | 3,965,575      | 99                | 3490                                        |
| M2       | 9,297,168 | 913,620,593   | 35.8               | 101                    | 98                                | 1196       | 3,931,291      | 89                | 3444                                        |

83

84

85

86 Table S4: Phenotypic and genetic characteristics of PNG isolates.

| Strains           | Country (year)  | VNTR profile*                     | VP  | PolyB | CCA | ctxB | RstR | tcpA | rstC | CTX Ch1 | CTX Ch2                              |
|-------------------|-----------------|-----------------------------------|-----|-------|-----|------|------|------|------|---------|--------------------------------------|
| This study (n=21) | PNG (2009-2011) | 10,6,8,(8/9),(11/12) <sup>†</sup> | Pos | R     | Pos | Cl   | Cl   | ET   | Neg  | Neg     | CTX <sup>CL</sup> -CTX <sup>CL</sup> |

87 <sup>†</sup> The VNTR profiles for 12/21 Papua New Guinea strains are taken from Horwood et al. (4). The additional 9 strains analysed in this study all had a profile  
88 of 10, 6, 8, 8 12.

89 CCA Chicken erythrocyte agglutination; VP Vogues Proskauer; PolyB polymyxin B (50 U) susceptibility; R resistant, S susceptible; Cl Classical; ET El Tor.

90



Table S5: *V. cholerae* strains used to conduct genome comparisons.

| Name           | Accession | Country of isolation | Year of isolation |
|----------------|-----------|----------------------|-------------------|
| 4605           | ERR018111 | India                | 2007              |
| 4656           | ERR018112 | India                | 2006              |
| 4675           | ERR018113 | Bangladesh           | 2001              |
| 4679           | ERR018114 | Bangladesh           | 1999              |
| 4663           | ERR018115 | Bangladesh           | 2001              |
| 4661           | ERR018116 | Bangladesh           | 2001              |
| 4660           | ERR018117 | Bangladesh           | 1994              |
| 4110           | ERR019879 | Vietnam              | 1995              |
| 4111           | ERR019880 | Vietnam              | 2002              |
| 4322           | ERR019881 | India                | 2004              |
| 4642           | ERR019882 | India                | 2006              |
| 4670           | ERR019883 | Bangladesh           | 1991              |
| 4672           | ERR019884 | Bangladesh           | 2000              |
| 4122           | ERR019885 | Vietnam              | 2007              |
| BangladeshA330 | ERR018119 | India                | 1993              |
| IndiaMBN17     | ERR018123 | India                | 2004              |
| IndiaVC51      | ERR018124 | India                | 1992              |
| IndiaV212_1    | ERR018125 | India                | 1991              |
| IndiaV109      | ERR018126 | India                | 1990              |
| IndiaV5        | ERR018127 | India                | 1989              |
| BangladeshA488 | ERR018128 | Bangladesh           | 2006              |
| IndiaMBRN14    | ERR018130 | India                | 2004              |

|                |           |            |      |
|----------------|-----------|------------|------|
| IndiaMJ1485    | ERR018120 | Bangladesh | 1994 |
| BangladeshA383 | ERR018121 | Bangladesh | 2002 |
| IndiaMG160     | ERR018122 | Bangladesh | 1991 |
| KoreaA177      | ERR018149 | Columbia   | 1992 |
| KoreaA155      | ERR018150 | Mozambique | 1991 |
| KoreaA154      | ERR018151 | Mozambique | 1991 |
| KoreaA152      | ERR018152 | Mozambique | 1991 |
| KoreaA131      | ERR018153 | India      | 1989 |
| KoreaA130      | ERR018154 | India      | 1989 |
| KoreaA185      | ERR018156 | Columbia   | 1992 |
| KoreaA184      | ERR018146 | Columbia   | 1992 |
| KoreaA109      | ERR018147 | unknown    | 1990 |
| KoreaA180      | ERR018148 | Columbia   | 1992 |
| KoreaA186      | ERR018158 | Argentina  | 1992 |
| KoreaA201      | ERR018167 | Argentina  | 1992 |
| KoreaA200      | ERR018168 | Argentina  | 1992 |
| KoreaA241      | ERR018169 | Vietnam    | 1989 |
| KoreaA232      | ERR018159 | Mexico     | 1991 |
| KoreaA193      | ERR018160 | Bolivia    | 1992 |
| KoreaA231      | ERR018161 | Mexico     | 1991 |
| KoreaA245      | ERR018171 | Vietnam    | 1989 |
| KoreaA481      | ERR018175 | Djibouti   | 2007 |
| KoreaA397      | ERR018176 | Bangladesh | 1987 |
| KoreaA390      | ERR018177 | Bangladesh | 1987 |
| KoreaA346      | ERR018179 | Bangladesh | 1994 |

|                |           |              |      |
|----------------|-----------|--------------|------|
| KoreaA316      | ERR018181 | Argentina    | 1993 |
| KoreaA487      | ERR018182 | Bangladesh   | 2007 |
| KoreaA483      | ERR018172 | Djibouti     | 2007 |
| KoreaA482      | ERR018174 | Djibouti     | 2007 |
| IndiaGP152     | ERR018188 | India        | 1979 |
| IndiaPRL5      | ERR018189 | India        | 1980 |
| IndiaGP145     | ERR018191 | India        | 1979 |
| IndiaGP143     | ERR018192 | Bahrain      | 1978 |
| IndiaGP140     | ERR018193 | Malaysia     | 1978 |
| IndiaGP106     | ERR018194 | West Germany | 1975 |
| IndiaPRL64     | ERR018195 | India        | 1992 |
| IndiaPRL18     | ERR018185 | India        | 1984 |
| IndiaGP60      | ERR018186 | India        | 1973 |
| IndiaIDHO1_726 | ERR018187 | India        | 2009 |
| Kenya6180      | ERR019286 | Kenya        | 2007 |
| Kenya6210      | ERR019290 | Kenya        | 2007 |
| Kenya6201      | ERR019291 | Kenya        | 2007 |
| Kenya6197      | ERR019292 | Kenya        | 2007 |
| Kenya6196      | ERR019293 | Kenya        | 2005 |
| Kenya6195      | ERR019294 | Kenya        | 2005 |
| Kenya6194      | ERR019295 | Kenya        | 2007 |
| Kenya6193      | ERR019296 | Kenya        | 2005 |
| Kenya6215      | ERR019297 | Kenya        | 2005 |
| Kenya6214      | ERR019287 | Kenya        | 2007 |
| Kenya6191      | ERR019288 | Kenya        | 2005 |

|           |           |            |      |
|-----------|-----------|------------|------|
| Kenya6212 | ERR019289 | Kenya      | 2007 |
| Kenya7682 | ERR028066 | Kenya      | 2009 |
| Kenya7687 | ERR028074 | Kenya      | 2009 |
| Kenya7686 | ERR028075 | Kenya      | 2009 |
| Kenya7685 | ERR028076 | Kenya      | 2009 |
| Kenya7684 | ERR028068 | Kenya      | 2009 |
| 1346      | ERR025356 | Mozambique | 2005 |
| 4551      | ERR025357 | India      | 2007 |
| 4623      | ERR025358 | India      | 2007 |
| 4593      | ERR025359 | India      | 2007 |
| 4538      | ERR025360 | India      | 2007 |
| 4339      | ERR025361 | India      | 2004 |
| 4121      | ERR025362 | Vietnam    | 2004 |
| 4113      | ERR025364 | Vietnam    | 2003 |
| 4585      | ERR025366 | India      | 2007 |
| 4552      | ERR025368 | India      | 2007 |
| 4488      | ERR025369 | India      | 2006 |
| 4784      | ERR025370 | Tanzania   | 2009 |
| 4600      | ERR025371 | India      | 2007 |
| 4646      | ERR025372 | India      | 2007 |
| 4662      | ERR025373 | Bangladesh | 2001 |
| 4519      | ERR025374 | India      | 2005 |
| 4536      | ERR025375 | India      | 2007 |
| 1326      | ERR025367 | Mozambique | 2005 |
| 1672      | ERR025377 | Mozambique | 2005 |

|         |           |            |      |
|---------|-----------|------------|------|
| 4698    | ERR025379 | India      | 1980 |
| 4713    | ERR025380 | unknown    | 1973 |
| 4714    | ERR025381 | Angola     | 1989 |
| 4715    | ERR025382 | Indonesia  | 1957 |
| 4716    | ERR025383 | Bangladesh | 1979 |
| 4717    | ERR025384 | India      | 1977 |
| 4718    | ERR025385 | Bangladesh | 1971 |
| 4719    | ERR025386 | Bangladesh | 1979 |
| 4720    | ERR025378 | Peru       | 1991 |
| 4721    | ERR025388 | Peru       | 1991 |
| 4722    | ERR025389 | Peru       | 1991 |
| 4723    | ERR025390 | Peru       | 1991 |
| 4764    | ERR025392 | Bangladesh | 1994 |
| 4772    | ERR025393 | Bangladesh | 2006 |
| 4771    | ERR025395 | Bangladesh | 2007 |
| MG16226 | ERR025396 | Bangladesh | 1991 |
| VE1     | ERR037738 | Kenya      | 2009 |
| VE2     | ERR037739 | Kenya      | 2009 |
| VE3     | ERR037741 | Kenya      | 2009 |
| KNE3C   | ERR117473 | Kenya      | 2010 |
| KNE134  | ERR117480 | Kenya      | 2009 |
| KNE134B | ERR117482 | Kenya      | 2009 |
| KNE11B  | ERR117484 | Kenya      | 2010 |
| KNE170  | ERR117485 | Kenya      | 2009 |
| KNE3G   | ERR117490 | Kenya      | 2010 |

|         |           |       |      |
|---------|-----------|-------|------|
| KNEXX   | ERR117544 | Kenya | 2009 |
| KNEXC   | ERR117555 | Kenya | 2009 |
| KNEXXH  | ERR117556 | Kenya | 2009 |
| KNE168  | ERR117569 | Kenya | 2009 |
| KNC145  | ERR117571 | Kenya | 2010 |
| KNC135  | ERR117572 | Kenya | 2009 |
| KNC151  | ERR117573 | Kenya | 2010 |
| KNC8884 | ERR117574 | Kenya | 2010 |
| KNC56   | ERR117577 | Kenya | 2010 |
| KNC8880 | ERR117578 | Kenya | 2010 |
| KNC133  | ERR117579 | Kenya | 2007 |
| KNC64   | ERR117580 | Kenya | 2010 |
| KNC8889 | ERR117581 | Kenya | 2010 |
| KNC149  | ERR117582 | Kenya | 2009 |
| KNC158  | ERR117583 | Kenya | 2010 |
| KNC11   | ERR117586 | Kenya | 2010 |
| KNC144  | ERR117587 | Kenya | 2010 |
| KNC147  | ERR117588 | Kenya | 2010 |
| KNC161  | ERR117590 | Kenya | 2009 |
| KNC146  | ERR117591 | Kenya | 2010 |
| KNC157  | ERR117592 | Kenya | 2009 |
| KNC1888 | ERR117593 | Kenya | 2010 |
| KNC156  | ERR117594 | Kenya | 2009 |
| KNC8885 | ERR117595 | Kenya | 2010 |
| KNC124  | ERR117596 | Kenya | 2009 |

|                |                |            |       |
|----------------|----------------|------------|-------|
| KNC155         | ERR117597      | Kenya      | 2010  |
| KNC143         | ERR117598      | Kenya      | 2010  |
| KNC8669        | ERR117599      | Kenya      | 2010  |
| KNC231         | ERR117600      | Kenya      | 2009  |
| KNC205         | ERR117601      | Kenya      | 2009  |
| KNC1583        | ERR117602      | Kenya      | 20109 |
| KNC241         | ERR117603      | Kenya      | 2009  |
| KNC206         | ERR117604      | Kenya      | 2009  |
| KNC233         | ERR117605      | Kenya      | 2009  |
| KNC8679        | ERR117606      | Kenya      | 2008  |
| KNC1420        | ERR117607      | Kenya      | 2008  |
| KNC207         | ERR117609      | Kenya      | 2009  |
| KNC8675        | ERR117610      | Kenya      | 2009  |
| KNC8572        | ERR117612      | Kenya      | 2009  |
| KNC1509        | ERR117613      | Kenya      | 2009  |
| KNC8673        | ERR114415      | Kenya      | 2009  |
| KNC8678        | ERR114416      | Kenya      | 2009  |
| KNC208         | ERR114418      | Kenya      | 2009  |
| KNC1709        | ERR114417      | Kenya      | 2009  |
| 352STDY5570522 | ERR386666      | Guinea     | 2012  |
| 2010EL_1786    | AELH00000000.1 | Haiti      | 2010  |
| 2010EL_1792    | AELJ00000000.1 | Haiti      | 2010  |
| 2010EL_1798    | AELI00000000.1 | Haiti      | 2010  |
| B33            | ACHZ00000000   | Mozambique | 2004  |
| CIRS101        | ACVW00000000   | Bangladesh | 2002  |

|        |                   |                  |      |
|--------|-------------------|------------------|------|
| Lae1   | SAMN08873981      | Papua New Guinea | 2010 |
| M66    | CP001233/CP001234 | Indonesia        | 1937 |
| Mdg2   | SAMN08873982      | Papua New Guinea | 2010 |
| MJ1236 | CP001485/CP001486 | Bangladesh       | 1994 |
| MO10   | AAKF03000000      | India            | 1992 |
| RC9    | ACHX00000000      | Keyna            | 1985 |
| VC1    | SRR308665         | Nepal            | 2010 |
| VC2    | SRR308690         | Nepal            | 2010 |
| VC3    | SRR308691         | Nepal            | 2010 |
| VC4    | SRR308692         | Nepal            | 2010 |
| VC5    | SRR308693         | Nepal            | 2010 |
| VC6    | SRR308703         | Nepal            | 2010 |
| VC7    | SRR308704         | Nepal            | 2010 |
| VC8    | SRR308705         | Nepal            | 2010 |
| VC9    | SRR308706         | Nepal            | 2010 |
| VC10   | SRR308707         | Nepal            | 2010 |
| VC11   | SRR308708         | Nepal            | 2010 |
| VC12   | SRR308709         | Nepal            | 2010 |
| VC13   | SRR308713         | Nepal            | 2010 |
| VC14   | SRR308715         | Nepal            | 2010 |
| VC15   | SRR308716         | Nepal            | 2010 |
| VC16   | SRR308717         | Nepal            | 2010 |
| VC18   | SRR308721         | Nepal            | 2010 |
| VC19   | SRR308722         | Nepal            | 2010 |
| VC20   | SRR308723         | Nepal            | 2010 |



|             |              |             |      |
|-------------|--------------|-------------|------|
| VC21        | SRR308724    | Nepal       | 2010 |
| VC22        | SRR308725    | Nepal       | 2010 |
| VC25        | SRR308726    | Nepal       | 2010 |
| VC26        | SRR308727    | Nepal       | 2010 |
| CNRVC010100 | ERR1877943   | Indonesia   | 2001 |
| CNRVC150239 | ERR1879538   | Cambodia    | 1993 |
| CNRVC930155 | ERR1879570   | Thailand    | 1993 |
| CNRVC990194 | ERR1879644   | Cambodia    | 1999 |
| CNRVC990209 | ERR1879645   | Laos        | 1999 |
| 956-CDC     | ERR576975    | China       | 2001 |
| 936-CDC     | ERR576976    | China       | 1998 |
| 93284-CDC   | ERR576977    | China       | 1993 |
| 147-CDC     | ERR579085    | China       | 2002 |
| CNRVC030438 | ERR1878096   | Iraq        | 2003 |
| CNRVC980060 | ERR976561    | Cameroon    | 1998 |
| CNRVC940184 | ERR998662    | Chad        | 1994 |
| CNRVC990019 | ERR976585    | Mozambique  | 1999 |
| B_64        | ERR044797    | Mozambique  | 2004 |
| Zim_25      | ERR044799    | Zimbabwe    | 2005 |
| CNRVC030391 | ERR1878094   | Somalia     | 2003 |
| 1944-CDC    | ERR579924    | China       | 2000 |
| 2530-CDC    | ERR579921    | China       | 1996 |
| 1593-CDC    | ERR579930    | China       | 1992 |
| 1627        | ERR025377    | Mozambique  | 2005 |
| PhVC-311    | SAMN02352646 | Philippines | 2011 |

|          |              |             |      |
|----------|--------------|-------------|------|
| PhVC-326 | SAMN02352647 | Philippines | 2011 |
| PhVC-5   | SAMN02352648 | Philippines | 2011 |

Table S6: Predicted genes on the 34 kb plasmid of *V. cholerae* isolate L1

| <b>Left</b> | <b>Right</b> | <b>Gene</b> | <b>Locus tag</b> | <b>Product</b>                             |
|-------------|--------------|-------------|------------------|--------------------------------------------|
| 252         | 473          |             | vclae_00068      | Hypothetical protein                       |
| 546         | 758          |             | vclae_00069      | Hypothetical protein                       |
| 869         | 1090         |             | vclae_00070      | Hypothetical protein                       |
| 1187        | 1858         |             | vclae_00071      | Site-specific tyrosine recombinase XerD    |
| 2560        | 4161         | parB1       | vclae_00072      | Chromosome-partitioning protein parB       |
| 4170        | 4889         |             | vclae_00073      | ParA-like protein                          |
| 4919        | 5530         |             | vclae_00074      | Hypothetical protein                       |
| 5502        | 5849         |             | vclae_00075      | Hypothetical protein                       |
| 5978        | 6151         |             | vclae_00076      | Hypothetical protein                       |
| 6198        | 6965         |             | vclae_00077      | Hypothetical protein                       |
| 7772        | 8746         |             | vclae_00078      | Hypothetical protein                       |
| 9009        | 9296         | sinR        | vclae_00079      | HTH-type transcriptional regulator sinR    |
| 9437        | 9610         |             | vclae_00080      | Hypothetical protein                       |
| 9594        | 10244        |             | vclae_00081      | VirB8 protein                              |
| 10241       | 11335        |             | vclae_00082      | Type IV secretory pathway VirB9 components |
| 11335       | 12531        |             | vclae_00083      | Type IV secretion system protein virB10    |
| 12524       | 14275        |             | vclae_00084      | Hypothetical protein                       |
| 14281       | 15183        | ptlH        | vclae_00085      | Pertussis toxin liberation protein H       |
| 15194       | 17155        | traG        | vclae_00086      | Conjugal transfer protein traG             |
| 17420       | 18226        |             | vclae_00087      | Hypothetical protein                       |
| 18234       | 19085        |             | vclae_00088      | Hypothetical protein                       |

|       |       |        |             |                                               |
|-------|-------|--------|-------------|-----------------------------------------------|
| 19094 | 19393 |        | vclae_00089 | Hypothetical protein                          |
| 19407 | 19727 |        | vclae_00090 | Hypothetical protein                          |
| 19724 | 22078 | virB4  | vclae_00091 | Type IV secretion system protein virB4        |
| 22088 | 22345 |        | vclae_00092 | Hypothetical protein                          |
| 22393 | 25416 |        | vclae_00093 | Relaxase/Mobilisation nuclease domain protein |
| 25397 | 25840 |        | vclae_00094 | Hypothetical protein                          |
| 26215 | 26535 |        | vclae_00095 | Hypothetical protein                          |
| 26606 | 28870 | topB_1 | vclae_00096 | DNA topoisomerase 3                           |
| 28867 | 29112 |        | vclae_00097 | Hypothetical protein                          |
| 29234 | 29680 | ssb_1  | vclae_00098 | Helix-destabilizing protein                   |
| 29796 | 29963 |        | vclae_00099 | Hypothetical protein                          |
| 30165 | 30380 |        | vclae_00100 | Hypothetical protein                          |
| 30448 | 30594 |        | vclae_00101 | Hypothetical protein                          |
| 30606 | 31091 |        | vclae_00102 | Hypothetical protein                          |
| 31105 | 31395 |        | vclae_00103 | Hypothetical protein                          |
| 31422 | 31691 |        | vclae_00104 | Hypothetical protein                          |
| 31703 | 32032 |        | vclae_00105 | Hypothetical protein                          |
| 32046 | 32255 |        | vclae_00106 | Hypothetical protein                          |
| 32269 | 32619 |        | vclae_00107 | Hypothetical protein                          |
| 32632 | 32889 |        | vclae_00108 | Hypothetical protein                          |
| 32892 | 33140 |        | vclae_00109 | Hypothetical protein                          |
| 33294 | 33452 |        | vclae_00110 | Hypothetical protein                          |
| 33470 | 33685 |        | vclae_00111 | Hypothetical protein                          |

---

## Supplementary References

1. **Chun J, Grim CJ, Hasan NA, Lee JH, Choi SY, Haley BJ, Taviani E, Jeon YS, Kim DW, Lee JH, Brettin TS, Bruce DC, Challacombe JF, Detter JC, Han CS, Munk AC, Chertkov O, Meincke L, Saunders E, Walters RA, Huq A, Nair GB, Colwell RR.** 2009. Comparative genomics reveals mechanism for short-term and long-term clonal transitions in pandemic *Vibrio cholerae*. *Proc Natl Acad Sci U S A* **106**:15442-15447.
2. **WHO.** 1987. Manual for Laboratory Investigations of Acute Enteric Infections. World Health Organization, Geneva.
3. **CLSI.** 2012. Performance standards for antimicrobial susceptibility testing; twenty-second informational supplement. CLSI document M100-S22. Clinical and Laboratory Standards Institute, Wayne, PA.
4. **WHO.** 2003. Manual for the laboratory identification and antimicrobial susceptibility testing of bacterial pathogens of public health importance in the developing world. World Health Organization, Geneva.
5. **Sjolund-Karlsson M, Reimer A, Folster JP, Walker M, Dahourou GA, Batra DG, Martin I, Joyce K, Parsons MB, Boncy J, Whichard JM, Gilmour MW.** 2011. Drug-resistance mechanisms in *Vibrio cholerae* O1 outbreak strain, Haiti, 2010. *Emerg Infect Dis* **17**:2151-2154.
